# Supplementary material for: Anthocyanin supplementation improves anti-oxidative and anti-inflammatory capacity in a dose–response manner in subjects with dyslipidemia
Source: PubMed Central journal article supplement — Redox Biol. 2020 Feb 26;32:101474. doi: 10.1016/j.redox.2020.101474 (PMC7078384; doi:10.1016/j.redox.2020.101474), 2020-02-26
Supplement: mmc1.pdf [file mmc1.pdf]

1 The Medox and placebo capsules were similar and processed and packaged at the Biolink  
 2 Group's own processing factory in Sandnes, Norway. Medox is a veg-encapsulated  
 3 anthocyanin extract from wild Norwegian bilberries (*Vaccinium myrtillus*) and black  
 4 currants (*Ribes nigrum*). The anthocyanin capsules also contained pullulan, maltodextrin,  
 5 and citric acid (which occupied for 4% per capsule and was helpful to maintain stability  
 6 of anthocyanins), whereas the placebo capsules only contained pullulan and maltodextrin.  
 7 The specific ingredients of anthocyanins capsules are shown in Supplemental Table S1.

8 **Supplemental Table S1 The composition of anthocyanins capsules**

| Components                                   | Content |
|----------------------------------------------|---------|
| Bilberry ( <i>Vaccinium myrtillus</i> ) skin | 45-52%  |
| Blackcurrant ( <i>Ribes nigrum</i> ) skin    | 12-13%  |
| Pullulan                                     | 20-28%  |
| Maltodextrin                                 | 11-12%  |
| Citric acid                                  | 3-4%    |

9 European bilberry and black currant are rich in a variety of anthocyanins, mainly  
 10 concentrated in the peel. According to literatures, bilberry contains 15 kinds of natural  
 11 anthocyanins; blackcurrant contains 4 kinds of natural anthocyanins, the composition  
 12 detailed in Table S2. The total amount of anthocyanins in each capsule is 80mg, which is  
 13 a mixture of 3-O-rutinosides of cyanidin and delphinidin, and 3-O-b-galactosides, 3-O-b-  
 14 glucosides, and 3-O-b-arabinosides of cyanidin, peonidin, delphinidin, petunidin, and  
 15 malvidin. The relative contents of various anthocyanins are shown in Table S3.

16 **Supplemental Table S2 The anthocyanins contained in *Vaccinium myrtillus* and**

17 ***Ribes nigrum***

| No           | Anthocyanins                           | Abbreviations |
|--------------|----------------------------------------|---------------|
| Vaccinium    |                                        |               |
| 1            | Delphinidin 3-O- $\beta$ -glucosides   | Dp-3-G        |
| 2            | Delphinidin 3-O- $\beta$ -galactosides | Dp-3-gal      |
| 3            | Delphinidin 3-O- $\beta$ -arabinosides | Dp-3-A        |
| 4            | Cyanidin 3-O- $\beta$ -glucosides      | Cy-3-G        |
| 5            | Cyanidin 3-O- $\beta$ -galactosides    | Cy-3-gal      |
| 6            | Cyanidin 3-O- $\beta$ -arabinosides    | Cy-3-A        |
| 7            | Petunidin 3-O- $\beta$ -glucosides     | Pe-3-G        |
| 8            | Petunidin 3-O- $\beta$ -galactosides   | Pe-3-gal      |
| 9            | Petunidin 3-O- $\beta$ -arabinosides   | Pe-3-A        |
| 10           | Peonidin 3-O- $\beta$ -glucosides      | Pn-3-G        |
| 11           | Peonidin 3-O- $\beta$ -galactosides    | Pn-3-gal      |
| 12           | Peonidin 3-O- $\beta$ -arabinosides    | Pn-3-A        |
| 13           | Malvidin 3-O- $\beta$ -glucosides      | Mv-3-G        |
| 14           | Malvidin 3-O- $\beta$ -galactosides    | Mv-3-gal      |
| 15           | Malvidin 3-O- $\beta$ -arabinosides    | Mv-3-A        |
| Ribes nigrum |                                        |               |
| 1            | Delphinidin 3-O- $\beta$ -glucosides   | Dp-3-G        |
| 2            | Cyanidin 3-O- $\beta$ -glucosides      | Cy-3-G        |
| 3            | Delphinidin 3-O-rutinoside             | Dp-3-R        |
| 4            | Cyanidin 3-O-rutinoside                | Cy-3-R        |

18

19 **Supplemental Table S3 The relative contents of anthocyanins in Medox capsules**

| Anthocyanins             | Content (%) |
|--------------------------|-------------|
| Dp-3-G, Dp-3-gal, Dp-3-A | 58.0        |
| Cy-3-G, Cy-3-gal, Cy-3-A | 33.0        |
| Mv-3-G, Mv-3-gal, Mv-3-A | 3.0         |
| Pe-3-G, Pe-3-gal, Pe-3-A | 2.5         |
| Pn-3-G, Pn-3-gal, Pn-3-A | 2.5         |

---

|                |              |
|----------------|--------------|
| Dp-3-R, Cy-3-R | 1.0          |
| <b>Total</b>   | <b>100.0</b> |

---
